# Supplementary material for: A High Throughput Approach Based on Dynamic High Pressure for the Encapsulation of Active Compounds in Exosomes for Precision Medicine
Source: MDPI journal article supplement (doi:10.3390/ijms22189896), 2021-09-13
Supplement: s1 [file s1]

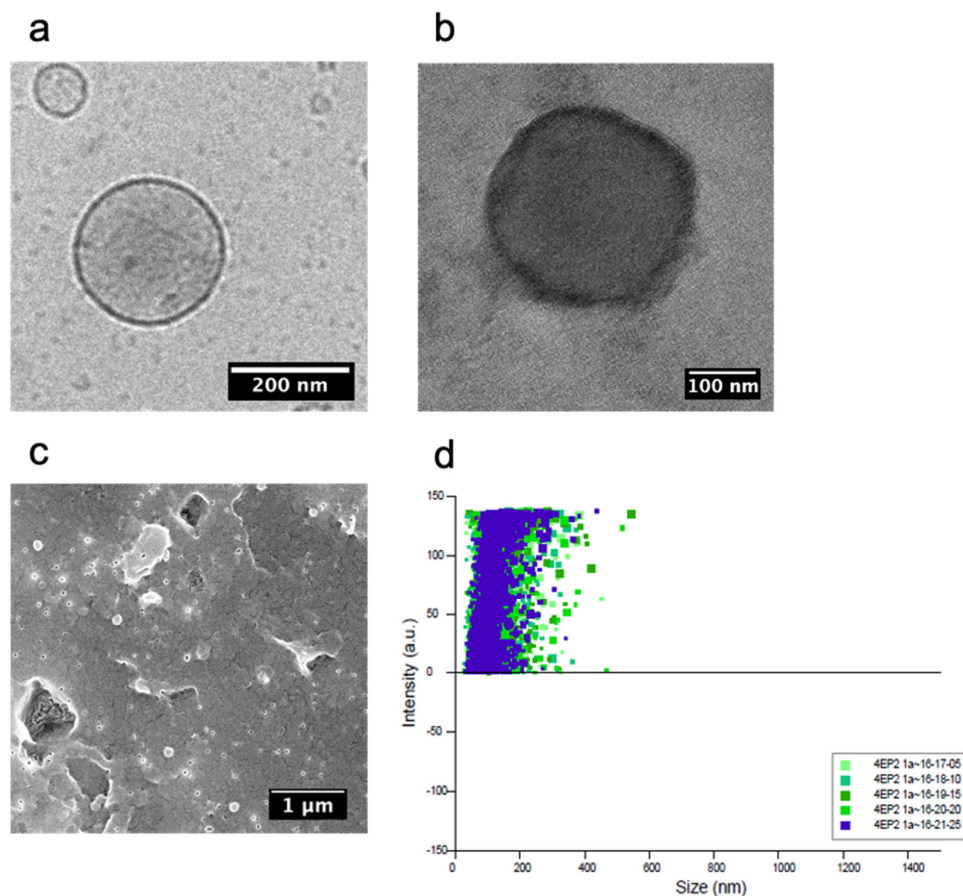

**Figure S1.** Characterization of untreated U87-Exos. (a) representative cryo-TEM, (b) TEM and (c) SEM images, show ovoidal-shaped vesicles, (d) Intensity/Size graph by Nanosight shows a size distribution in the range between 30-200 nm.

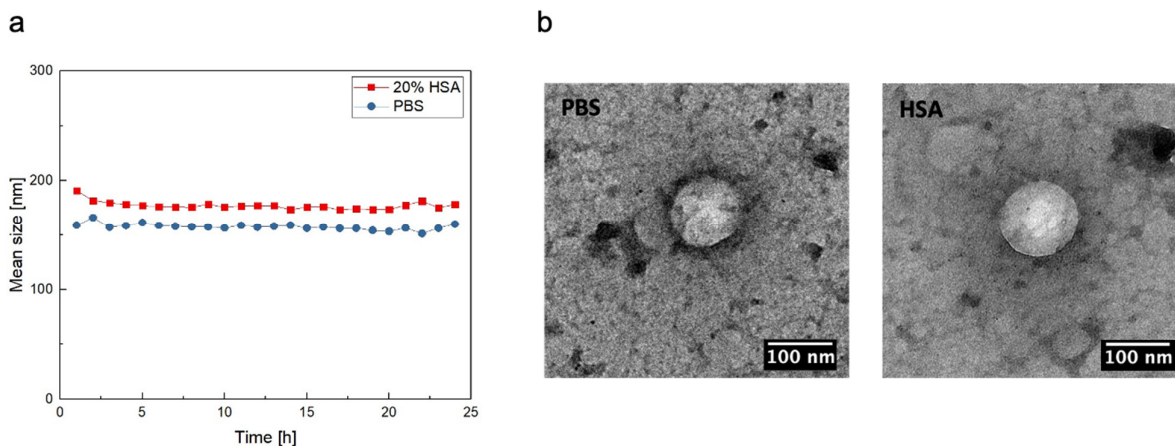

**Figure S2.** Stability studies of untreated U87-Exos in PBS and PBS containing 20% HSA at 37° C in a time lapse of 24 h. This analysis was performed through DLS, by setting the cell at 37 °C and measuring the size trend every hr to assess the vesicles biocompatibility. (a) Exos mean size is stable throughout the 24 h both in PBS and 20% HSA, (b) TEM observation after 24 h confirmed Exos stability.

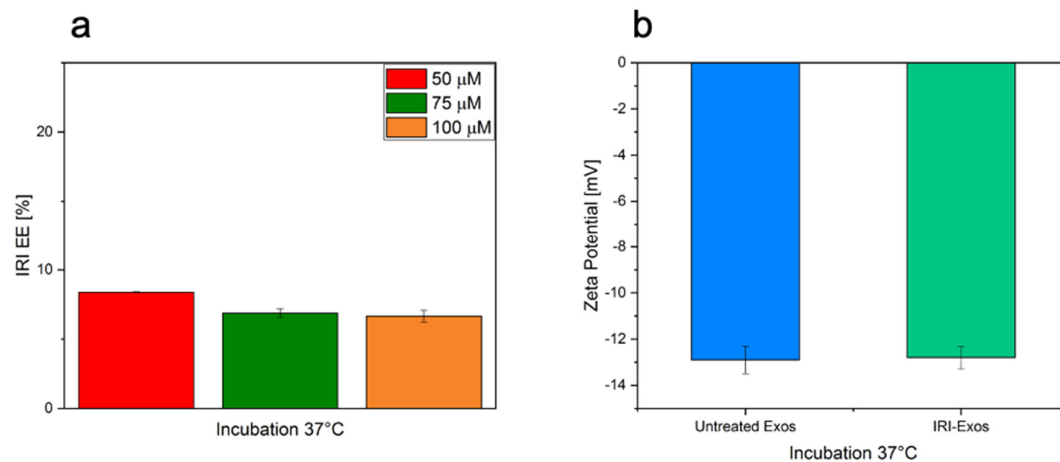

**Figure S3.** Co-incubation of Exos with IRI 2 hrs at 37 °C. (a) EE% of Exos at three different concentrations of IRI, (b) Zeta Potential comparison between Untreated Exos and Co-incubated vesicles shows no sensible difference in surface charge stability after interaction with drug.

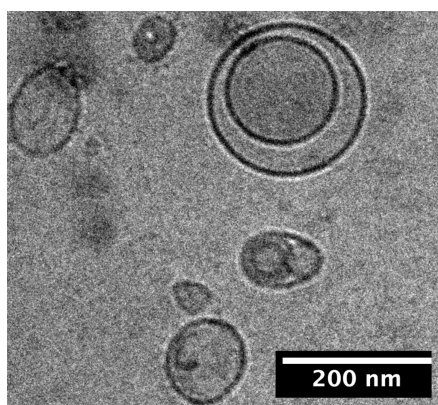

**Figure S4.** Representative Cryo-TEM image of IRI-Exos-15.
